# Supplementary material
Source: MDPI journal article supplement (https://www.mdpi.com/1999-4907/12/9/1161)

## SUPPLEMENTARY MATERIAL

**Figure S1. Relationship between log-transformed Basal Area Increment (BAI) and tree size of sampled black pines (n = 100). Grey points represent observations. Black line depicts fitted polynomial regression (loess) to the data.**

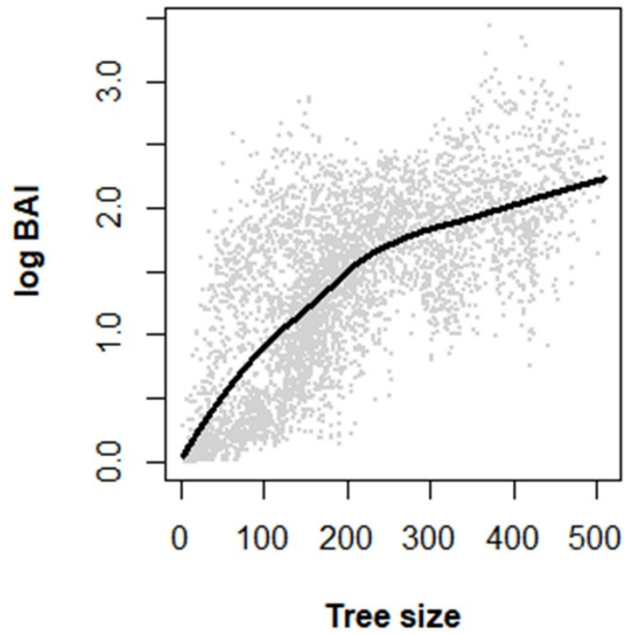

**Table S1. Age class, basal area ( $\text{m}^2\text{ha}^{-1}$ ), density (No. trees  $\text{ha}^{-1}$ ) and mean ( $\pm$  SD) DBH (cm) of each sampled black pine stand.**

| Stand | Age class | Basal area | Density | Mean DBH          |
|-------|-----------|------------|---------|-------------------|
| T1P1  | 60–180    | 32.42      | 645     | $22.39 \pm 13.88$ |
| T1P2  | 60–181    | 33.59      | 748     | $20.03 \pm 15.79$ |
| T2P1  | 65–95     | 41.35      | 828     | $21.73 \pm 5.43$  |
| T2P2  | 65–90     | 40.85      | 1106    | $20.40 \pm 5.58$  |
| T3P1  | 65–100    | 30.68      | 1281    | $19.45 \pm 5.11$  |
| T3P2  | 67–100    | 31.03      | 1424    | $19.23 \pm 6.88$  |
| T4P1  | 10–90     | 13.49      | 708     | $20.68 \pm 14.30$ |
| T4P2  | 10–85     | 14.97      | 851     | $15.99 \pm 11.98$ |
| T5P1  | 1–80      | 16.56      | 2769    | $11.74 \pm 15.42$ |
| T5P2  | 1–60      | 21.41      | 2157    | $17.34 \pm 17.48$ |

**Figure S2. Boxplot of the diameter at breast height (DBH), basal area increment (BAI), stand basal area and density of sampled black pines and stands.**

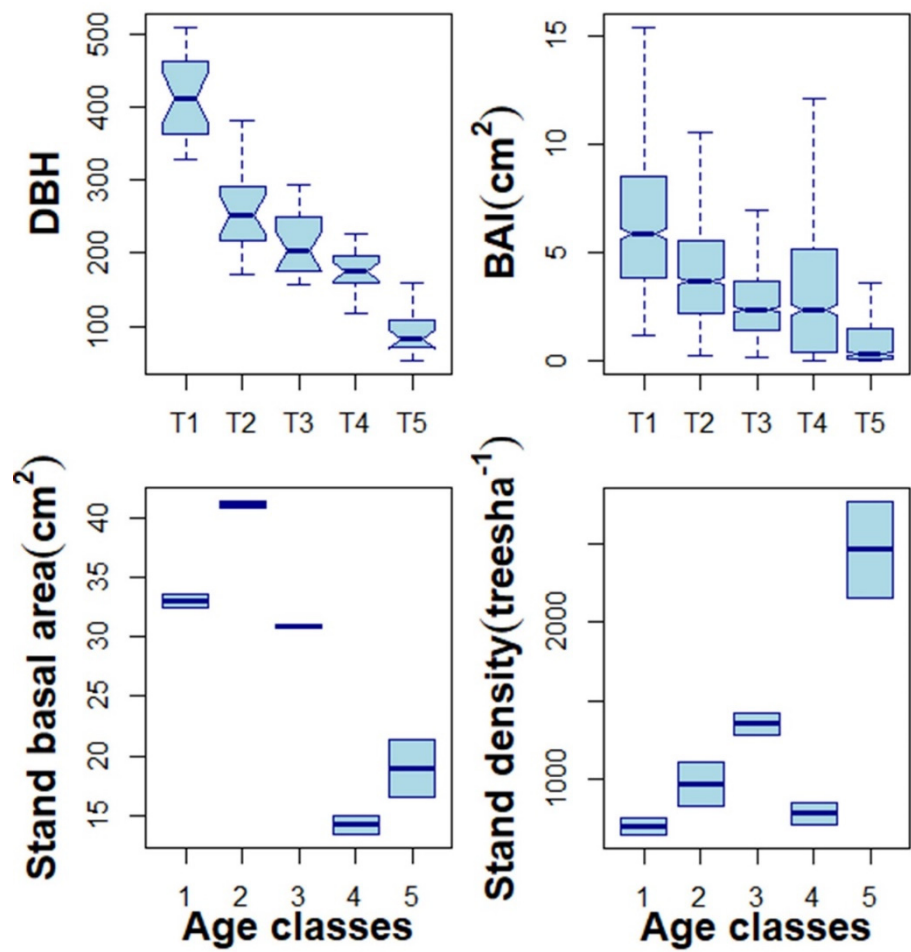

**Figure S3: Predicted effect (blue lines) of tree size, temperature and water balance (P-PET) on log-transformed Basal Area Increment (BAI) of sampled black pines (n=100). Grey belts and grey points show 95% confident intervals for model predictions and observations, respectively.**

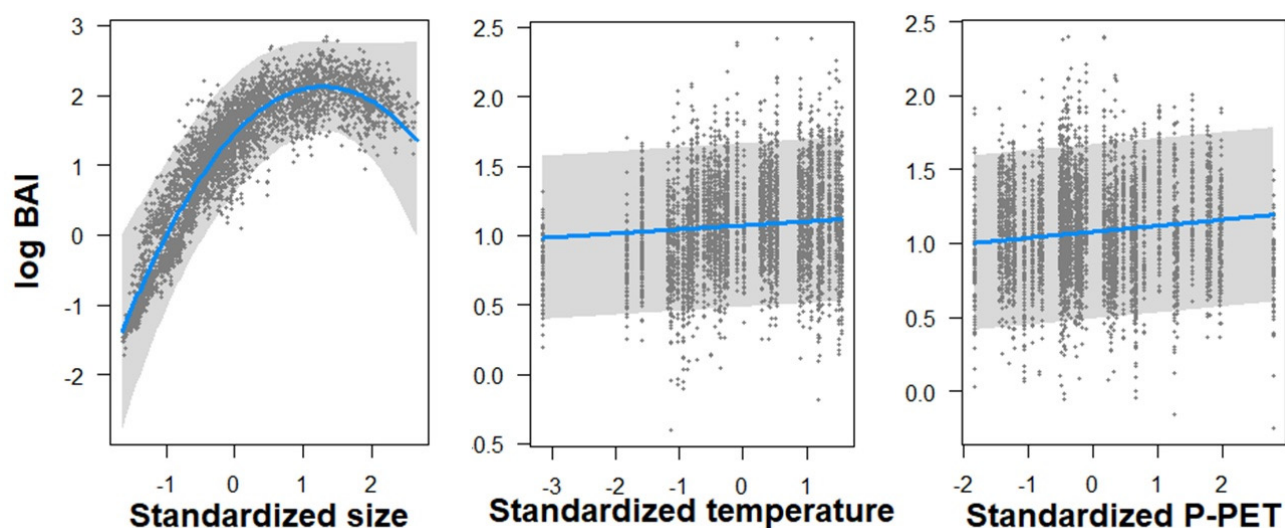

**Figure S4: Mean Basal Area Increment (BAI) for age class and for each drought event and the three years preceding and following the event. Drought events identified in 1981, 1991, 1999 and 2005 (black vertical line).**

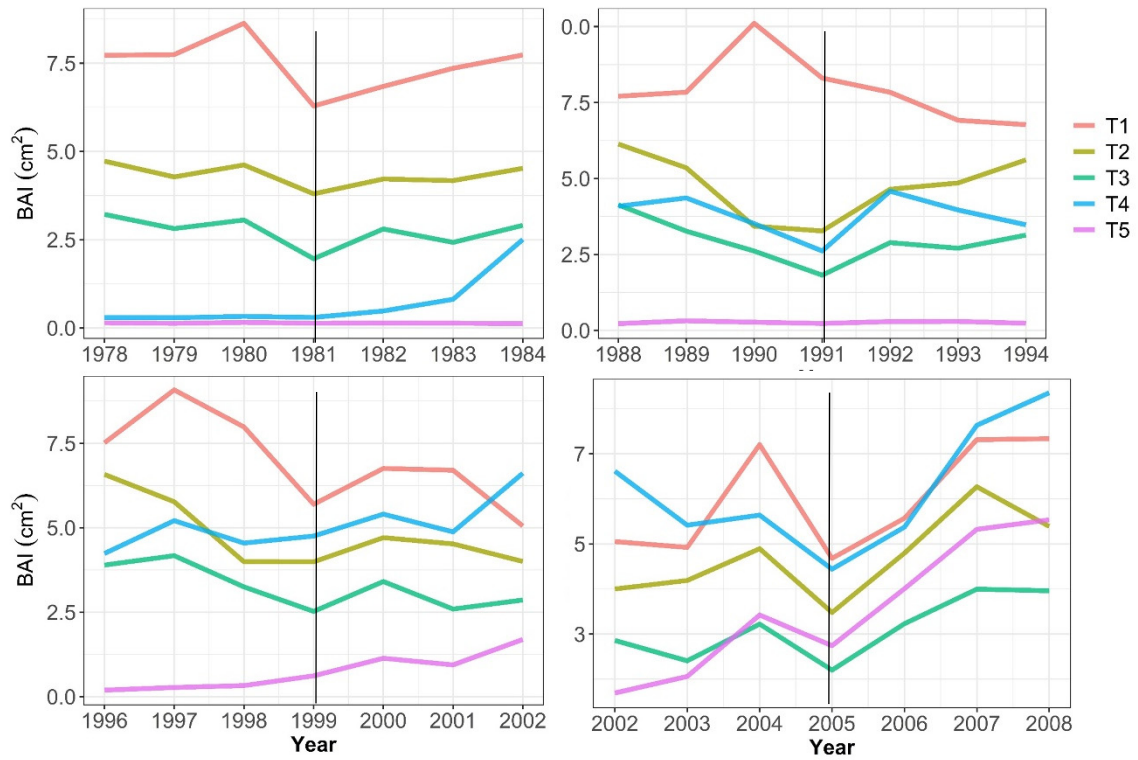

Supplement: s1 [file s1]
